# Supplementary material
Source: publisher figshare collection journal article supplement (https://rs.figshare.com/ndownloader/files/14057297)
Supplement: Supplementary file 1 [file 14057297]

**Supplementary material for ‘*Convergent evolution of reduced eggshell conductance in avian brood parasites.’***

Stephanie C. McClelland, Gabriel A. Jamie, Katy Waters, Lara Caldas, Claire N. Spottiswoode and Steven J. Portugal

**Additional analysis with exclusions of small sample sizes**

In order to address the issue of small sample sizes, the analyses were rerun excluding species were only a single egg was available. In the case of the PGLS model of eggshell conductance, only the african quailfinches was excluded, as only a single sufficiently large shell fragment was available. This did not change the significance of the factors included in the average model (see model output below).

As requested by the reviewer we have reperformed the analysis with the exclusion of these species. Two species were removed from the whole egg dataset and six from the fragment dataset. This had minimal effect on the results of the comparative analysis between host and parasite *G*H2O. However due to the increased ‘weight’ of the cowbird and host pair (for whom the trend was reversed) in the model, parasite status was just above significant. When the cowbird was also removed there was once again a significant effect of parasitie status on *G*H2O (*p*= 0.02). (see below)

**Model output from pgls excluding african quailfinches**

Call:

model.avg(object = list5, subset = weight > 0.05)

Component model call:

pgls(formula = <6 unique values>, data = S.comp.da, lambda = 0.71)

Component models:

|  | df | logLik | AICc | delta | weight |
| --- | --- | --- | --- | --- | --- |
| 2345 | 5 | -12.11 | 36.3 | 0 | 0.25 |
| 34 | 3 | -14.86 | 36.49 | 0.19 | 0.23 |
| 134 | 4 | -14.05 | 37.44 | 1.14 | 0.14 |
| 12345 | 6 | -11.26 | 37.52 | 1.22 | 0.14 |
| 3 | 2 | -16.6 | 37.58 | 1.28 | 0.13 |
| 1235 | 5 | -12.99 | 38.05 | 1.75 | 0.11 |

Term codes:

Breeding.latitude parasite.stat

1 2

Shell_thickness_um Wet.parent

3 4

parasite.stat:Shell_thickness_um

5

Model-averaged coefficients:

(full average)

|  | Estimate | Std. Error | z value | Pr(>|z|) |  |
| --- | --- | --- | --- | --- | --- |
| (Intercept) | -0.56623 | 0.304086 | 1.862 | 0.0626 | . |
| parasite.staty | -0.796854 | 0.952403 | 0.837 | 0.4028 |  |
| Shell_thickness_um | -4.265344 | 1.789727 | 2.383 | 0.0172 | * |
| Wet.parentyes | -0.420299 | 0.357924 | 1.174 | 0.2403 |  |
| parasite.staty:Shell_thickness_um | 8.113308 | 9.862837 | 0.823 | 0.4107 |  |
| Breeding.latitude | -0.001661 | 0.003006 | 0.553 | 0.5804 |  |

(conditional average)

|  | Estimate | Std. Error | z value | Pr(>|z|) |  |
| --- | --- | --- | --- | --- | --- |
| (Intercept) | -0.56623 | 0.304086 | 1.862 | 0.0626 | . |
| parasite.staty | -1.60934 | 0.724134 | 2.222 | 0.0263 | * |
| Shell_thickness_um | -4.265344 | 1.789727 | 2.383 | 0.0172 | * |
| Wet.parentyes | -0.551965 | 0.30914 | 1.785 | 0.0742 | . |
| parasite.staty:Shell_thickness_um | 16.385773 | 7.804396 | 2.1 | 0.0358 | * |
| Breeding.latitude | -0.004312 | 0.003467 | 1.244 | 0.2135 |  |

---

Signif. codes: 0 ‘***’ 0.001 ‘**’ 0.01 ‘*’ 0.05 ‘.’ 0.1 ‘ ’ 1

Relative variable importance:

Shell_thickness_um Wet.parent parasite.stat

Importance: 1.00 0.76 0.50

N containing models: 6 4 3

parasite.stat:Shell_thickness_um Breeding.latitude

Importance: 0.50 0.39

N containing models: 3 3

**Host-parasite comparison**

Fragment samples with 6 species with n=1 removed

*G*H2O (not corrected by weight)

*Welch Two Sample t-test*

*G*H2O *by host-parasite status*

*t = 2.8706, df = 4.7112, p-value = 0.03748*

*alternative hypothesis: true difference in means is not equal to 0*

*95 percent confidence interval:*

*0.03041374 0.66280250*

*sample estimates:*

*mean in group Host mean in group Parasite*

*0.7666081 0.4200000*

*G*H2O /g egg weight

*Welch Two Sample t-test*

*data: G*H2O */ g by host- parasite status*

*t = 3.8519, df = 4.934, p-value = 0.01229*

*alternative hypothesis: true difference in means is not equal to 0*

*95 percent confidence interval:*

*0.2186354 1.1066137*

*sample estimates:*

*mean in group Host mean in group Parasite*

*0.8629638 0.2003392*

Whole egg analysis with 2 species with n=1 removed

*G*H2O (not corrected by weight)

*Welch Two Sample t-test*

*data: G*H2O *by host-parasite status*

*t = 2.0495, df = 12.803, p-value = 0.06148*

*alternative hypothesis: true difference in means is not equal to 0*

*95 percent confidence interval:*

*-0.02840023 1.04722600*

*sample estimates:*

*mean in group Host mean in group Parasite*

*1.2790794 0.7696665*

***G*H2O** /g egg weight

*Welch Two Sample t-test*

*data: GH2O by host-parasite status*

*t = 3.5334, df = 10.832, p-value = 0.004796*

*alternative hypothesis: true difference in means is not equal to 0*

*95 percent confidence interval:*

*0.09397622 0.40600808*

*sample estimates:*

*mean in group Host mean in group Parasite*

*0.4991607 0.2491686*

***G*H2O** (not corrected by weight), with brown-headed cowbird and host also removed

*Welch Two Sample t-test*

*data: G*H2O *by host-parasite status*

*t = 2.5362, df = 10.959, p-value = 0.02774*

*alternative hypothesis: true difference in means is not equal to 0*

*95 percent confidence interval:*

*0.0868561 1.2313763*

*sample estimates:*

*mean in group Host mean in group Parasite*

*1.3711993 0.7120831*
